# Supplementary material for: Synthesis and characterization of pluronic-block-poly(N,N-dimethylamino-2-ethyl methacrylate) pentablock copolymers for drug/gene co-delivery systems
Source: Royal Society of Chemistry journal article supplement (doi:10.1039/c4ra04308a), 2014-07-15
Supplement: c4ra04308a1.pdf [file c4ra04308a1.pdf]

## Supporting Information

(a)

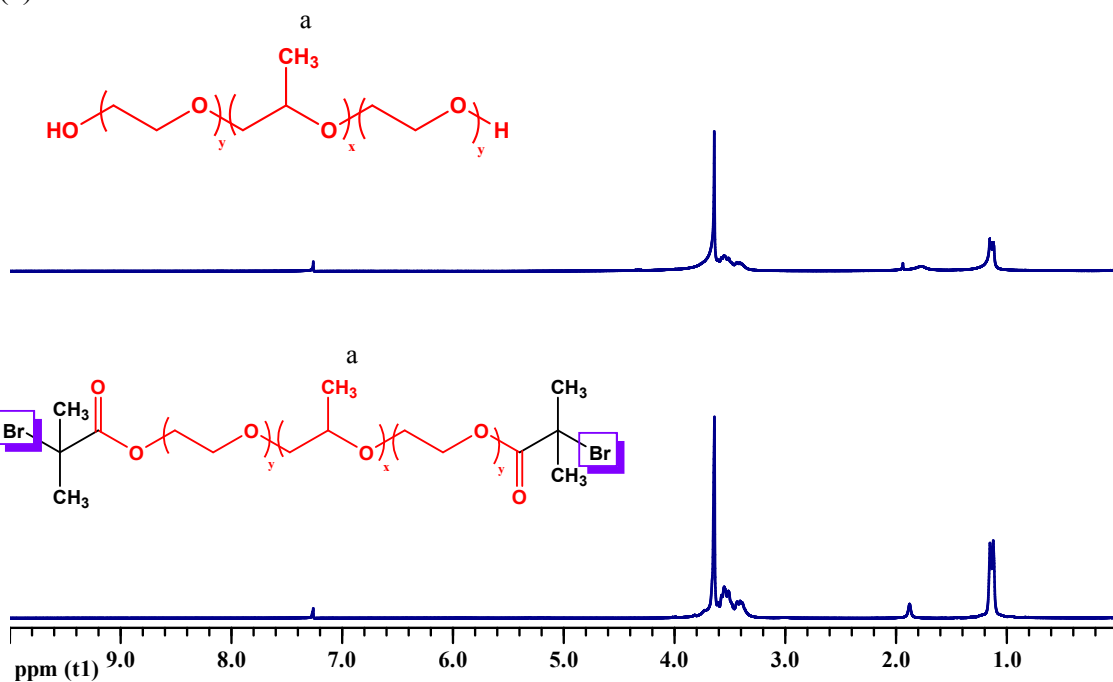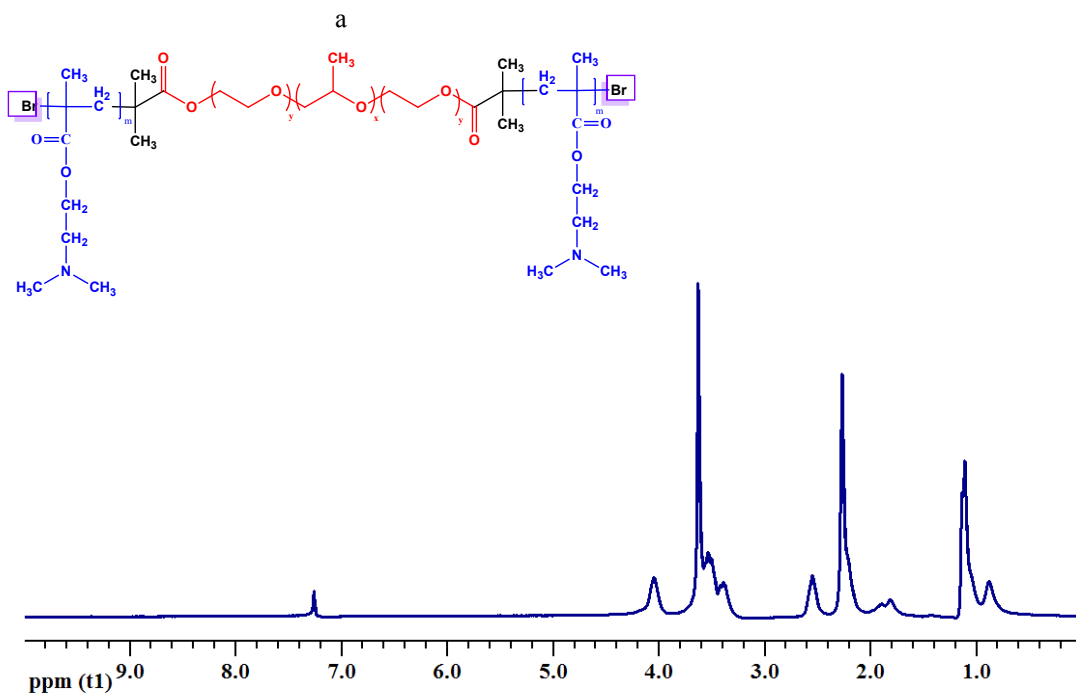

(b)

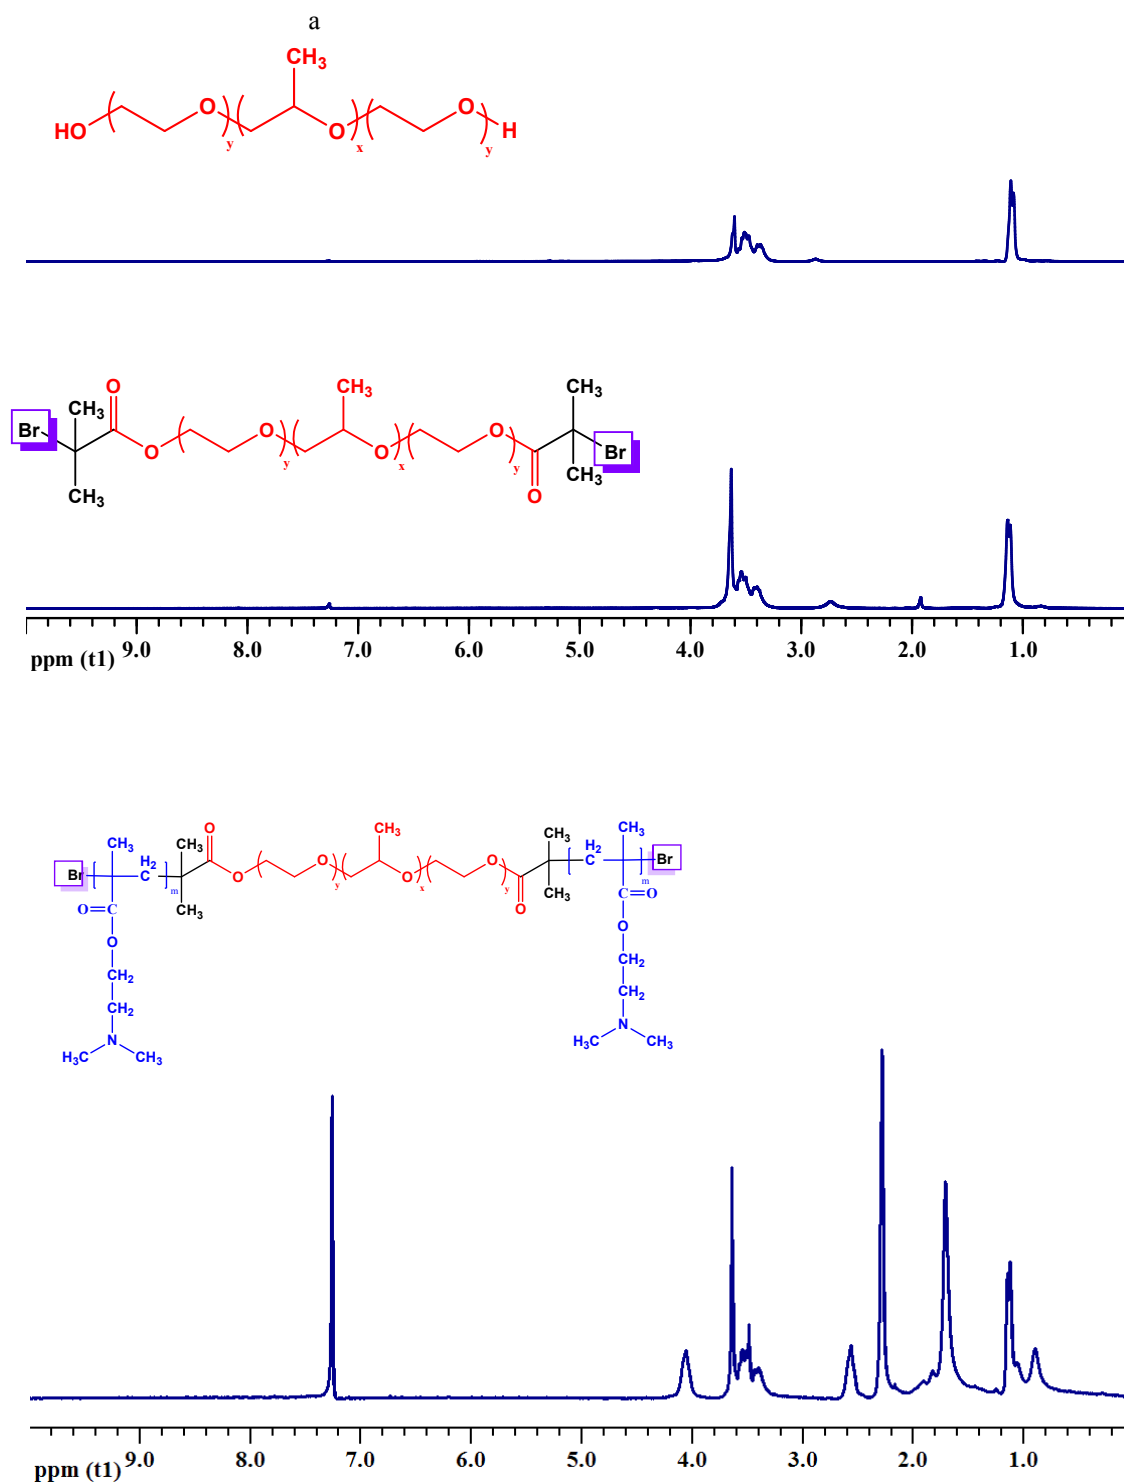

**Figure S1.** <sup>1</sup>H-NMR spectra of (a) PP123, PP123-Br and PP123-*b*-pDMAEMA, (b) PL121, PL121-Br and PL121-*b*-pDMAEMA.

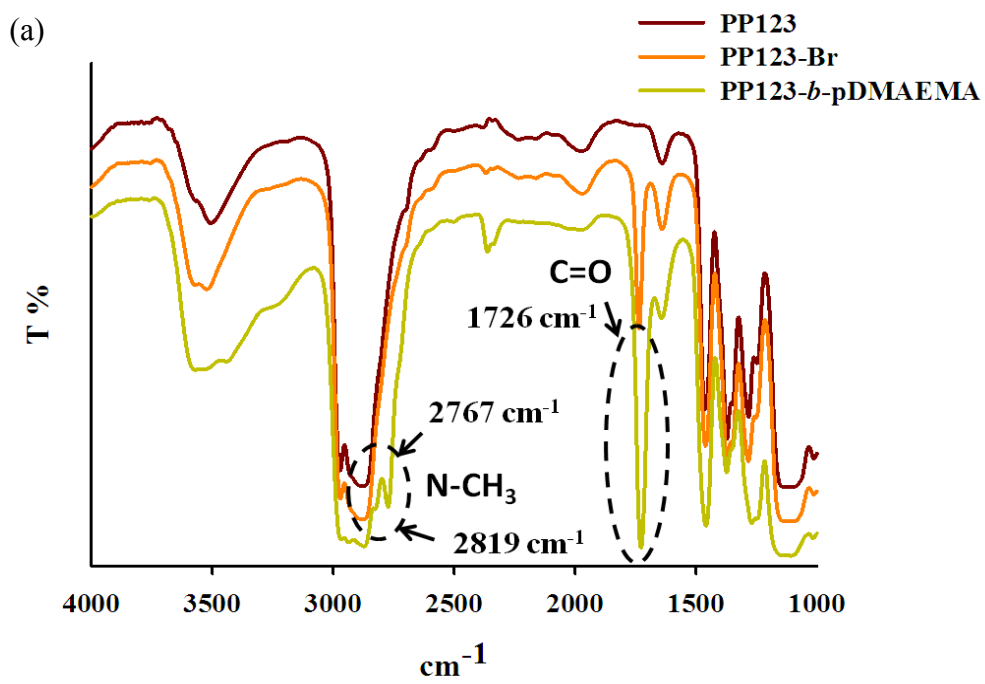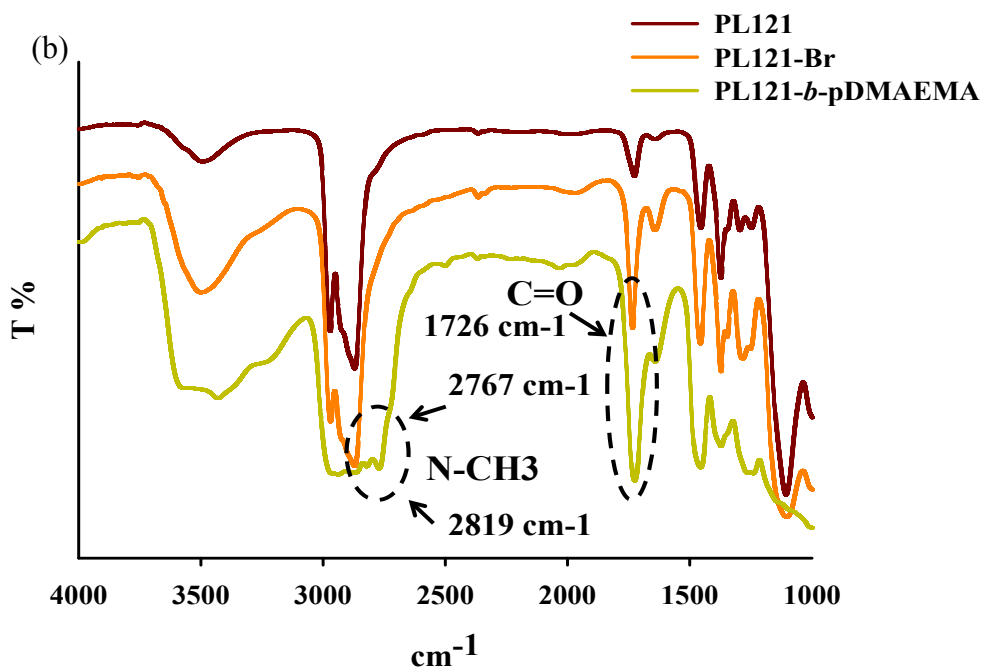

**Figure S2.** FTIR spectra of (a) PP123, PP123-Br and PP123-*b*-pDMAEMA (b) PL121, PL121-Br and PL121-*b*-pDMAEMA.

(a)

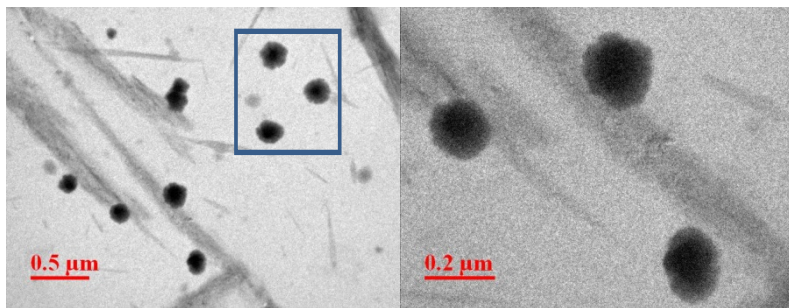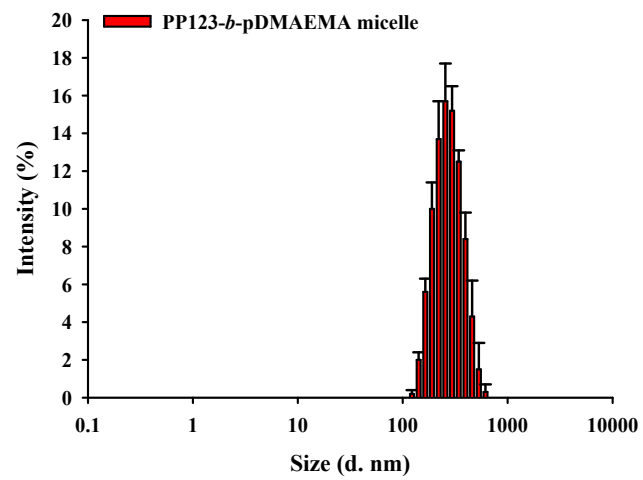

(b)

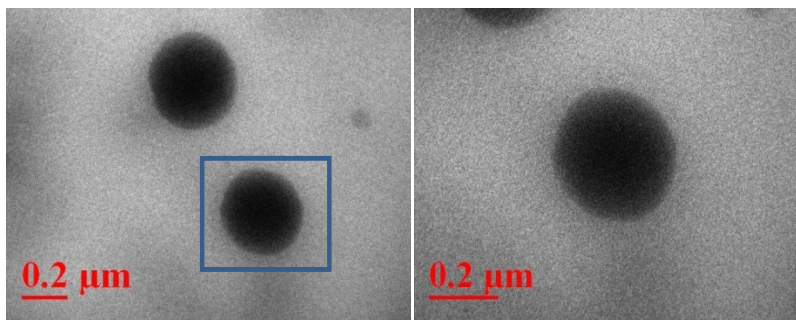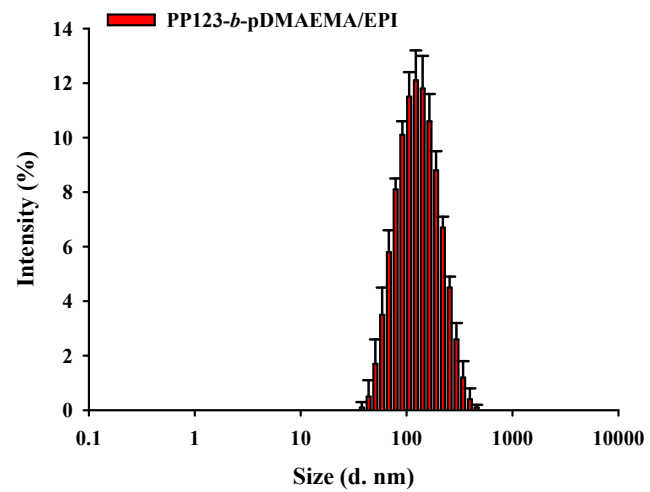

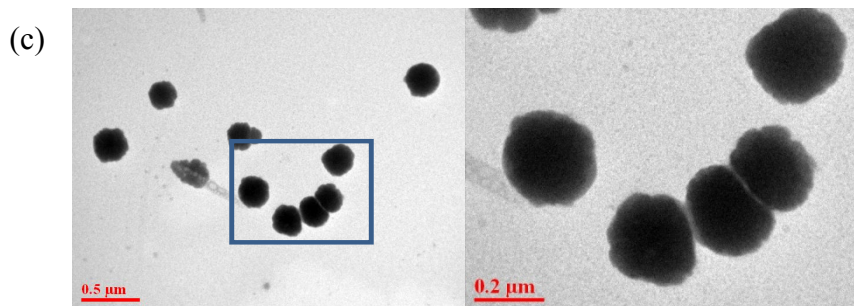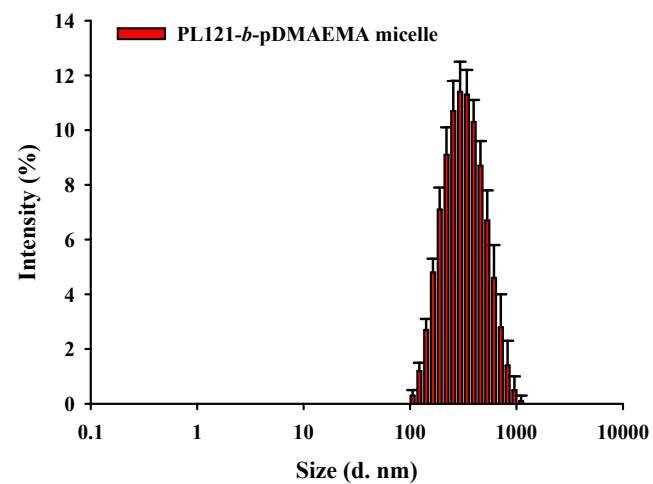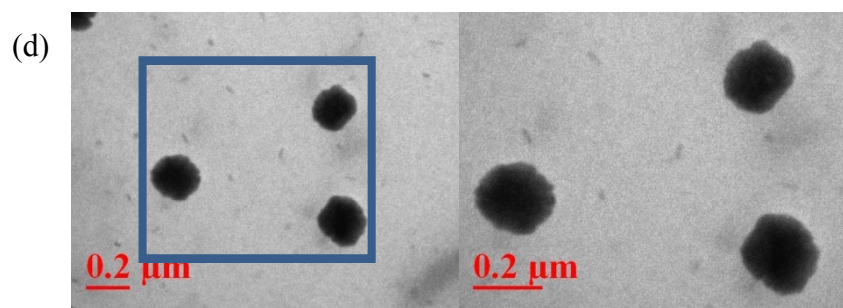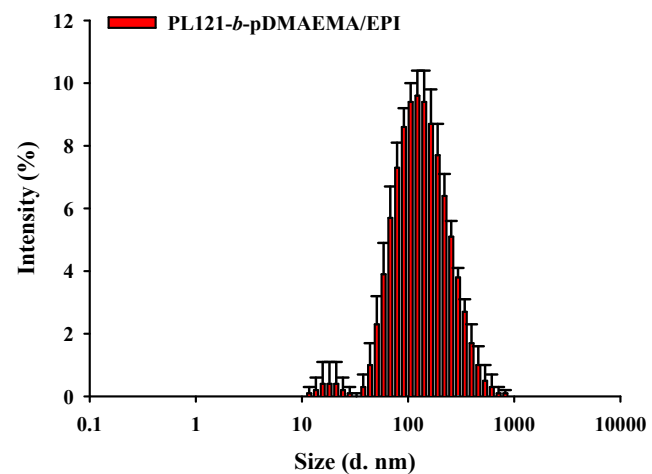

**Figure S3.** TEM images and dynamic light scattering (DLS) diagrams of (a) PP123-*b*-pDMAEMA micelle without EPI (b) PP123-*b*-pDMAEMA micelle with EPI (c) PL121-*b*-pDMAEMA micelle without EPI (d) PL121-*b*-pDMAEMA micelle with EPI.

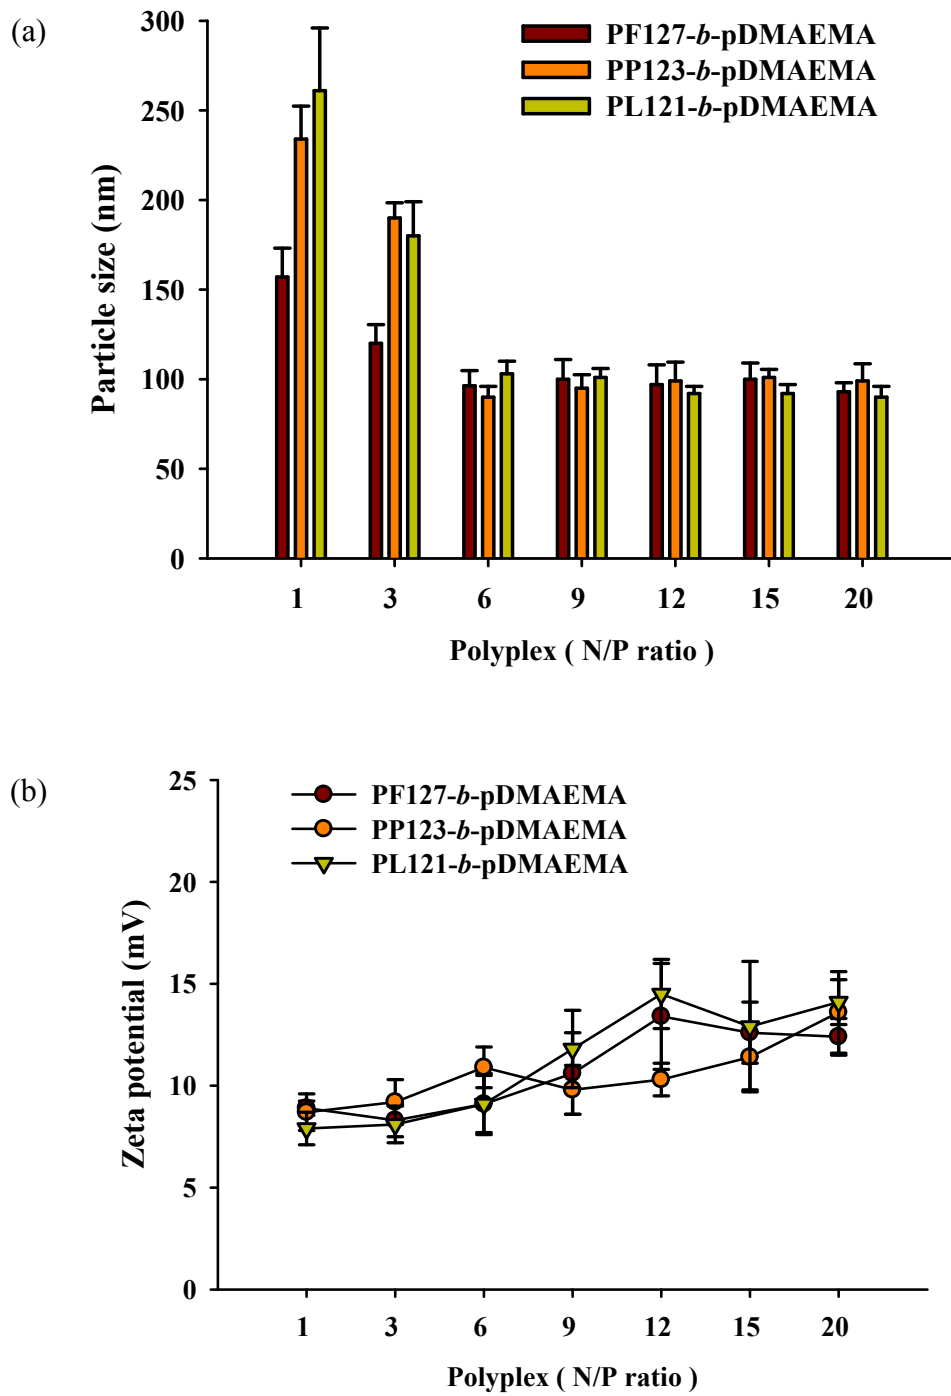

**Figure S4.** (a) Hydrodynamic diameters and (b) zeta potentials of copolymer/pDNA polyplexes at various N/P ratios (n= 3)

PF127-*b*-pDMAEMA    PP123-*b*-pDMAEMA    PL121-*b*-pDMAEMA

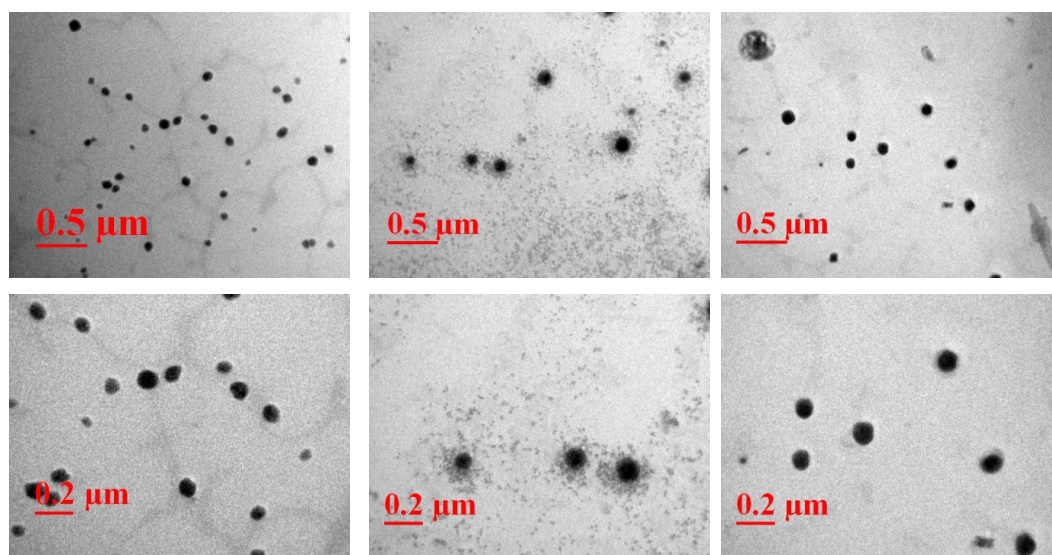

Figure S5. TEM images of copolymer/pDNA polyplexes at N/P= 9.

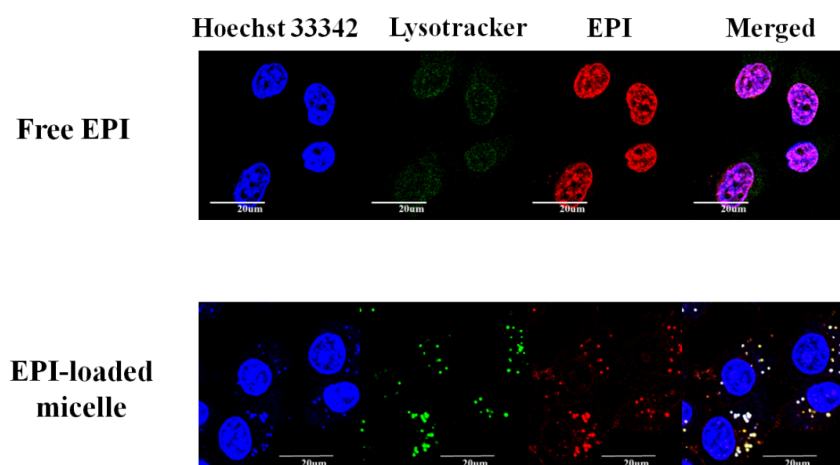

Figure S6. Confocal images of the free EPI and EPI-loaded PL121-*b*-pDMAEMA micelle.
